# Supplementary material for: The association between diabetes mellitus and prostate cancer: a meta-analysis and Mendelian randomization
Source: publisher site journal article supplement (doi:10.18632/aging.205886), 2024-06-04
Supplement: Supplementary file [file aging-v16i11-205886-supplementary-material-SD1.pdf]

SUPPLEMENTARY FIGURE

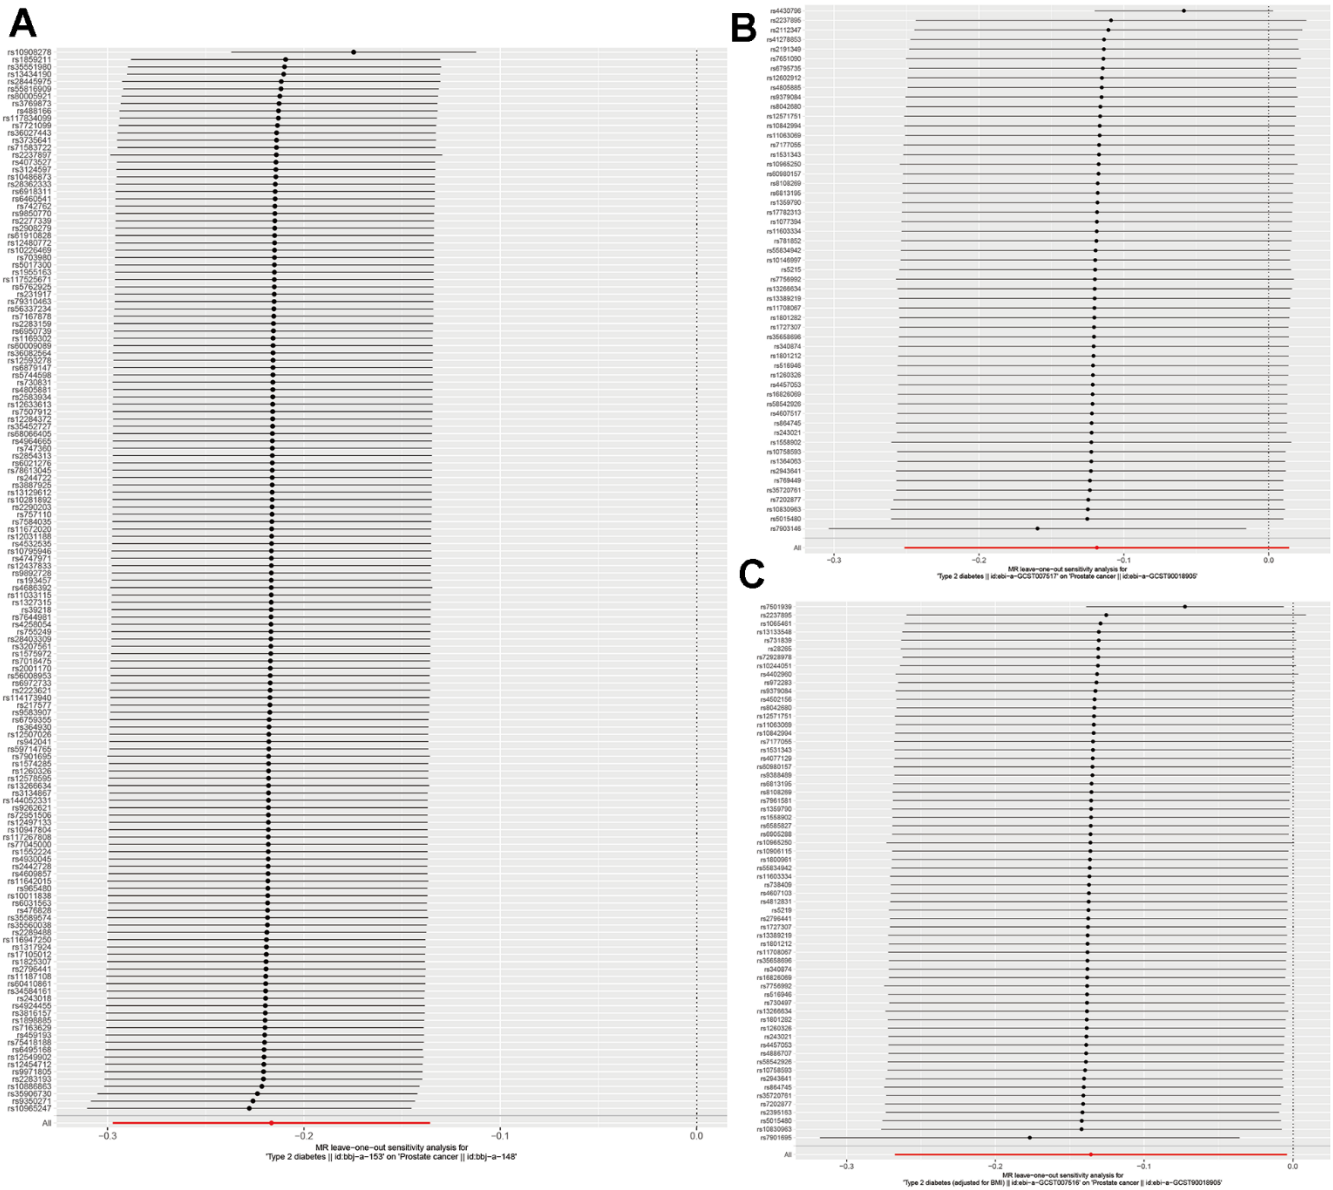

Supplementary Figure 1. The forest plot of Mendelian randomization. (A) The forest plot of MR in East Asia population. (B) The forest plot of MR in European population. (C) The forest plot of MR in European population adjusted by BMI.
