# Supplementary material for: The association between diabetes mellitus and prostate cancer: a meta-analysis and Mendelian randomization
Source: publisher site journal article supplement (doi:10.18632/aging.205886), 2024-06-04
Supplement: Supplementary file [file aging-v16i11-205886-supplementary-material-SD2.pdf]

## SUPPLEMENTARY TABLE

**Supplementary Table 1A. Details of search strategy to retrieve the studies using PubMed (Medline).**

**Date of Search: 9/17/2022**

| #  | Search terms                                                                                                                                                                                                                                                                                                                                                                                                            | Hits        |
|----|-------------------------------------------------------------------------------------------------------------------------------------------------------------------------------------------------------------------------------------------------------------------------------------------------------------------------------------------------------------------------------------------------------------------------|-------------|
| #1 | Search: “ Prostatic Neoplasms”[Mesh]                                                                                                                                                                                                                                                                                                                                                                                    | 149563      |
| #2 | Search: (Prostate Neoplasms) OR (Neoplasms, Prostate) OR (Neoplasm, Prostate) OR (Prostate Neoplasm) OR (Neoplasms, Prostatic) OR (Neoplasm, Prostatic) OR (Prostatic Neoplasm) OR (Prostate Cancer) OR (Cancer, Prostate) OR (Cancers, Prostate) OR (Prostate Cancers) OR (Cancer of the Prostate) OR (Prostatic Cancer) OR (Cancer, Prostatic) OR (Cancers, Prostatic) OR (Prostatic Cancers) OR (Cancer of Prostate) | 213661      |
| #3 | #1 OR #2                                                                                                                                                                                                                                                                                                                                                                                                                | 213661      |
| #4 | Search: “ Diabetes Mellitus “[Mesh]                                                                                                                                                                                                                                                                                                                                                                                     | 510469      |
| #5 | Search: (Diabetes) OR (Diabetes Mellitus)                                                                                                                                                                                                                                                                                                                                                                               | 948328      |
| #6 | #4 OR #5                                                                                                                                                                                                                                                                                                                                                                                                                | 948328      |
| #7 | <b>#3 and #6</b>                                                                                                                                                                                                                                                                                                                                                                                                        | <b>3435</b> |

**Supplementary Table 1B. Details of search strategy to retrieve the studies using Embase.**

**Date of Search: 9/17/2022**

| #  | Search terms                                                                                                                                                                                                                                                                                                                                                                                                    | Hits        |
|----|-----------------------------------------------------------------------------------------------------------------------------------------------------------------------------------------------------------------------------------------------------------------------------------------------------------------------------------------------------------------------------------------------------------------|-------------|
| #1 | ‘Diabetes’ OR ‘Diabetes Mellitus’                                                                                                                                                                                                                                                                                                                                                                               | 1579682     |
| #2 | ‘Prostate Neoplasms’ OR ‘Neoplasms, Prostate’ OR ‘Neoplasm, Prostate’ OR ‘Prostate Neoplasm’ OR ‘Neoplasms, Prostatic’ OR ‘Neoplasm, Prostatic’ OR ‘Prostatic Neoplasm’ OR ‘Prostate Cancer’ OR ‘Cancer, Prostate’ OR ‘Cancers, Prostate’ OR ‘Prostate Cancers’ OR ‘Cancer of the Prostate’ OR ‘Prostatic Cancer’ OR ‘Cancer, Prostatic’ OR ‘Cancers, Prostatic’ OR ‘Prostatic Cancers’ OR ‘Cancer of Prostate’ | 293405      |
| #3 | <b>#1 AND #2</b>                                                                                                                                                                                                                                                                                                                                                                                                | <b>8963</b> |

**Supplementary Table 1C. Details of search strategy to retrieve the studies using Cochrane.**

**Date of Search: 9/17/2022**

| #  | Search terms                                                                                                                                                                                                                                                                                                                                                                                                               | Hits     |
|----|----------------------------------------------------------------------------------------------------------------------------------------------------------------------------------------------------------------------------------------------------------------------------------------------------------------------------------------------------------------------------------------------------------------------------|----------|
| #1 | ((Diabetes) OR (Diabetes Mellitus)):ti,ab,kw                                                                                                                                                                                                                                                                                                                                                                               | 115706   |
| #2 | ((Prostate Neoplasms) OR (Neoplasms, Prostate) OR (Neoplasm, Prostate) OR (Prostate Neoplasm) OR (Neoplasms, Prostatic) OR (Neoplasm, Prostatic) OR (Prostatic Neoplasm) OR (Prostate Cancer) OR (Cancer, Prostate) OR (Cancers, Prostate) OR (Prostate Cancers) OR (Cancer of the Prostate) OR (Prostatic Cancer) OR (Cancer, Prostatic) OR (Cancers, Prostatic) OR (Prostatic Cancers) OR (Cancer of Prostate)):ti,ab,kw | 17564    |
| #3 | <b>#1 AND #2</b>                                                                                                                                                                                                                                                                                                                                                                                                           | <b>2</b> |
